1 **Migration of di-(2-ethylhexyl) phthalate from the plastic film into the air and**  
2 **vegetables in the greenhouses**

3  
4 Xiaowei Fu<sup>1,2\*</sup> Bin Huang<sup>3</sup>  
5

6 <sup>1</sup>College of Life Science, University of China Jiliang, Zhejiang, Hangzhou, 310018, China;

7 <sup>2</sup>Zhejiang Provincial Engineering Laboratory of Quality Controlling Technology and Instrumentation for  
8 Marine Food

9 <sup>3</sup>Hangzhou Wahaha Group Co., Ltd., Hangzhou 310018, China  
10  
11

12 **Keywords:** DEHP; vegetables; air; greenhouse; cover plastic film; temperature  
13

14 Author for correspondence. Tel:0571-8767-6372;Fax: 0571-8767-6372

15 E-mail:fxw13@163.com  
16

17 **Abstract:** The aim of this study was to investigate di-2-ethylhexyl phthalate (DEHP)  
18 from plastic film of the greenhouse to the air and the vegetables grown in the  
19 greenhouse. This paper presents the migration of di-2-ethylhexyl phthalate (DEHP)  
20 by determining the di-2-ethylhexyl phthalate (DEHP) concentration in air and  
21 vegetables in greenhouses with the change of temperature in a day and a half year. The  
22 determination of di-2-ethylhexyl phthalate (DEHP) content in the air and the  
23 vegetables was performed by gas chromatography-mass spectrometry. The results  
24 showed that di-2-ethylhexyl phthalate (DEHP) content in the greenhouse air increased  
25 with increasing temperature during one day, but di-2-ethylhexyl phthalate (DEHP)  
26 content changes in vegetable were different from those in air, and which depends on  
27 the exposure time. For the monthly content changes, di-2-ethylhexyl phthalate (DEHP)  
28 content in air first increased to a maximum and then decreased with increasing time  
29 and temperature. The di-2-ethylhexyl phthalate (DEHP) content changes of six  
30 vegetables not only were related with di-2-ethylhexyl phthalate (DEHP) content in air  
31 and temperature, but also with varieties of vegetables.  
32  
33  
34  
35

## 36 **Introduction**

37 Plastic greenhouses are a form of horticulture which plays a special role for supplying  
38 off-season vegetables. As food-safety is increasingly concerned, the safety evaluation  
39 of vegetable is not limited to heavy metals and pesticide residues, but also organic  
40 contaminants [9]. Contamination of vegetables by the plasticizers is being received  
41 serious attention. The most used plasticizer, di-(2-ethylhexyl)phthalate (DEHP) is  
42 easily released to environment from plastic products due to its instability, fluidity and  
43 volatility[1] since DEHP is not chemically bonded to the polymer of plastics.  
44 Therefore, DEHP from the greenhouse film is possible of an organic contaminant of  
45 vegetables cultivated in greenhouses.

46 Migration of DEHP from the plastic products to several foods was reported. Zhang et  
47 al.[19] reported that meat wrapped with PVC film could be contaminated by DEHP,  
48 and the migrated amount of DEHP depended on the temperature and time that the  
49 meat wrapped by plastic film. Goulas[7] studied that the migration of DEHP from  
50 food-grade polyvinyl chloride film into hard and soft cheeses, and the result showed  
51 that the longer the exposure, the higher levels of DEHP in cheese. The uptake of  
52 DEHP from plastic mulch film used in field cultivation by 10 vegetable plants was  
53 investigated by experiments carried out in pots by Du et al. [5,6]. The results showed  
54 that DEHP was transferred from the mulch film to all vegetable plants, and *Benincasa*  
55 *hispidia*, *Cucumis sativu*, *Cucurbita moschata* and *Brassica parachinensis* could  
56 accumulate high level of DEHP from mulch plastic film giving dietary exposure over  
57 or close to the daily intake limit for DEHP. The air DEHP from the plastic production  
58 building could cause contamination of vegetables according to a determination of  
59 DEHP concentrations in the atmosphere and four vegetable crops cultivated on land  
60 surrounding a plastic production factory [6]. However, no data is available concerning  
61 the migration of DEHP from the plastic film into vegetables in the greenhouses. This  
62 paper presents the migration of DEHP by determining the DEHP concentration in air  
63 and vegetables in greenhouses with the change of temperature in a day and a half  
64 year.

## 65 **Materials and methods**

### 66 **Solvents and reagents**

67 All solvents and reagents used for extraction were of analytical grade and  
68 purchased from Huadong Chemicals Company (Hangzhou, China). DEHP and  
69 chromatographically pure chloroform for dissolving DEHP standard was purchased  
70 from Sigma Shanghai Division (Shanghai, China).

### 71 **Film material**

72 The film was manufactured by Liaochen Plastic Film (Shangdong, China) and was  
73 used for the field-plant experiments.

#### 74 **Plants used for experiments**

75 Some vegetables cultivated in the plastic-film greenhouse including bok choy (*B.*  
76 *chinensis*), celery (*A. graveolens*), spinach (*S. oleracea L.*), cabbage (*B. oleracea*),  
77 lettuce (*L. sativa*), edible amaranth (*A. mangostanus*), were selected for testing DEHP  
78 uptake.

#### 79 **Sampling**

##### 80 **The daily variation of DEHP from the greenhouse films**

81 The edible parts of bok choy (*B. chinensis*) and the air samples in the greenhouses  
82 were collected at the same time for DEHP determination. The air samples were  
83 collected at 5:00, 8:00, 11:00, 14:00, 16:00, 19:00 and 22:00 in 3 consecutive days by  
84 the activated carbon adsorption method[17,18]. And the temperature at each time was  
85 recorded. For each DEHP determination, three replications were carried out.

##### 86 **The monthly variation of DEHP from the greenhouse films**

87 From December 1, 2010 to June 10, 2011, the air samples and six vegetables were  
88 collected in the tenth day of each month at 9:00 am. Six vegetables were planted in  
89 the first day of each month and sampled in the 10<sup>th</sup> day of next month. The air in the  
90 greenhouse was sampled by the activated carbon adsorption method, and the  
91 temperature at each time was recorded. For each DEHP determination, three  
92 replications were carried out.

#### 93 **Determination of DEHP**

##### 94 **Extraction of DEHP**

95 Vegetable samples were freeze-dried, ground and sieved to less than 0.2 mm. For  
96 each sample, 5-10 g was extracted in a Soxhlet extractor for 24 h with 200 mL  
97 acetone/dichloromethane (1:1,v/v) in a water-bath at 75 °C . The extracts were  
98 reduced to 5.0 mL using a rotary evaporator in a water-bath at 50 °C . The  
99 concentrated sample was subjected to clean-up.

100 Air samples: For each sample, 10 g was extracted in a Soxhlet extractor for 24 h with  
101 200 mL acetone/dichloromethane (1:1,v/v) in a water-bath at 55 °C . The extracts  
102 were reduced to 5.0 ml using a rotary evaporator in a water-bath at 50 °C . The  
103 concentrated sample was subjected to clean-up.

##### 104 **Clean-up**

105 The concentrated samples were loaded on a combined column of silica gel and  
106 alumina. The glass chromatography column 25 cm long, 1 cm I.D.) , was packed  
107 with 3 cm alumina plus 10 cm silica, followed by 2 cm anhydrous sodium sulfate.

108 Dichloromethane (20 mL) was used for elution. The collected fraction was reduced to  
109 0.5 mL under a gentle stream of nitrogen.

#### 110 **Gas chromatography-mass spectrometry**

111 The cleaned samples were analyzed by GC-MS [8,13] using a Hewlett-Packard  
112 5890/5971 GC-MSD (Agilent Technologies, Palo Alto, CA, USA) equipped with an  
113 HP-5 trace analysis column (30 m, 0.32 mm I.D., 0.25 mm film thickness). The GC  
114 oven temperature was held at 150 °C for 3 min, and programmed to increase at 20  
115 °C min<sup>-1</sup> to 300 °C and finally held at 300 °C for 3 min.

116 The temperature of the injector was 250 °C. Helium was the carrier gas at a linear  
117 flow-rate of 20.7 cm s<sup>-1</sup>. Full scan electron ionization data was obtained as follows:  
118 solvent delay 5 min, electron ionization energy 70 eV, source temperature 200 °C,  
119 emission current 150 μA, scan rate 4 scan s<sup>-1</sup>, detector voltage 350 V. The DEHP  
120 level in the sample was taken as the average of three injections. The amounts of  
121 DEHP were calculated from a calibration curve:  $y=0.0014x + 0.0006$  ( $r^2=0.9911$ ) for  
122 air samples and  $y=0.0008x + 0.0003$  ( $r^2=0.9848$ ) for vegetable samples. The final  
123 contents of the vegetables were expressed as μg g<sup>-1</sup> based on the amounts of the dried  
124 samples.

### 125 **Results and discussion**

#### 126 **The daily variation of DEHP from the greenhouse films**

##### 127 **The daily variation of DEHP in the greenhouse air**

128 The concentration of DEHP in the greenhouse air was determined by gas  
129 chromatography-mass spectrometry. The results show that the DEHP content in air  
130 increased with the increase of the greenhouse temperature (Fig.1). The air DEHP  
131 content was the lowest in 5:00, and then as the temperature rose, the content was  
132 gradually increased. To 2 pm when the temperature was the highest point, the DEHP  
133 content reached also the highest value. Then as the temperature decreased, the content  
134 was slowly declining. It was evident that the DEHP content in the greenhouse air was  
135 closely related with the greenhouse temperature.

136 During the day as temperatures rise, the temperature in the greenhouse also will  
137 increase. And it also accelerated the release rate of DEHP from the film. That is,  
138 DEHP content in air increased, and reached the highest point when the temperature  
139 reaches the maximum.

140 As the day time, the temperature gradually decreased. Subsequently the released rate  
141 of DEHP from the greenhouse films was affected, which was bound to affect the  
142 release of DEHP. Coupled with the greenhouse was not a closed container, or DEHP  
143 may also be absorbed by plants or soil in the greenhouse. Therefore, the temperature

144 dropped, the DEHP content in air also declined.

145 Wang et al.[16] reported that the characteristics of distribution of Phthalate esters  
146 (PAEs) in vegetable greenhouses. Our results are in agreement with their  
147 observations.

#### 148 **The daily variation of DEHP in the greenhouse vegetables**

149 Fig. 2 show that the DEHP content in the greenhouse vegetable was increased from  
150 morning to night. For the March 24, March 25, and March 26, 2011 samples, DEHP  
151 content were slowly increasing as time went on.

152 DEHP daily changes in vegetables were not consistent with those in the air (Fig.3).

153 DEHP daily content in air increased and then decreased, while the daily content in  
154 vegetables was increasing from the morning to the evening.

155 When the DEHP in the air was the highest levels, it does not contain the maximum  
156 amount of DEHP in vegetables. This can be inferred that the DEHP concentration in  
157 vegetables was related not only with the content of DEHP in the air, but also the time  
158 of absorption.

#### 159 **The monthly variation of DEHP from the greenhouse films**

##### 160 **The monthly variation of DEHP in the greenhouse air**

161 With the increase in the greenhouse age, levels of DEHP in the air firstly slowly rose  
162 and then rapidly rose and slowly declined followed two months (Fig.4). As time went  
163 on, the total amount of DEHP in films was gradually reduced, so that their emission  
164 was also reduced. Therefore, the concentration of DEHP in the air gradually  
165 decreased after reaching a certain concentration.

166 DEHP content in the air was also associated with the temperature. The higher the  
167 temperature, the faster the molecular thermal motion in films, which helps to  
168 evaporation and leaching of DEHP from the films. From December 10, 2010 to April  
169 10, 2011, with the gradual increase in ambient temperature, which will affect the  
170 micro-climate in the greenhouse, the concentration of DEHP of the air in the  
171 greenhouse increased slowly to reach maximum concentration in April. With levels of  
172 DEHP of the films decreasing, which will reduce its total dissolution, and thus the  
173 concentration of greenhouse air was gradually decreased (Fig.4). During May and  
174 June, although the temperature is relatively high, but the total DEHP content of films  
175 gradually reduced, which also reduced the emission of DEHP, and the number of  
176 open-air greenhouse were added, so levels of DEHP in air decreased. Zheng et al. [23]  
177 reported the migration of the PAEs from the PVC plastic products in the water  
178 environment. Wang et al.[16] studied the variations of the PAEs levels from winter to  
179 spring. These results are similar with our findings.

## 180 **The monthly variation of DEHP in the greenhouse vegetables**

181 Fig.5 show that the content changes of DEHP in *L. sativa*, *S. oleracea L.* and *A.*  
182 *mangostanus* were somewhat regular. With increasing age of the greenhouse, the  
183 DEHP content in the three vegetables also increased before May 10, 2011. However,  
184 the levels of DEHP in the six vegetables had decreased in varying degrees from May  
185 10, 2011 to June 10, 2011. This result is consistent with the variation of DEHP levels  
186 in the greenhouse air. There are two reasons to explain this result. One is that the total  
187 DEHP of the membrane decreased; second is that the greenhouse are required to  
188 increase ventilation times because of the high temperature.

189 Among the 6 vegetables, three kinds of vegetables (*L. sativa*, *B. chinensis* and *A.*  
190 *graveolens*) can be strong to absorb DEHP in air, followed by the other two  
191 vegetables (*S. oleracea L.* and *A. mangostanus*). While a vegetable (*B. oleracea*) is  
192 the weakest ability to absorb DEHP. The results concluded that the DEHP content in  
193 vegetables is related with the vegetable varieties. And different vegetables have  
194 different absorption or adsorption ability of DEHP. Wang Jiawen et al. [17] reported  
195 the DEHP pollution of vegetable from farmland and differences between vegetables  
196 species. contaminated by DEHP. Wang et al.[16] studied that the distribution of  
197 Phthalate esters in the greenhouse vegetables in the different ages. In this regard, our  
198 results are basically the same with their.

## 199 **Acknowledgements**

200 This research was supported by a fund (LY16D010003) from the Zhejiang Provincial  
201 National Science Foundation of China.

## 202 **Author contributions statements**

203 Xiaowei Fu wrote the main manuscript text and Bin Huang prepared figures 1–3. All  
204 authors reviewed the manuscript.

## 205 **Competing financial interests**

206 The authors declare no competing financial interests.

## 207 **References**

- 208 1. Bago, B.; Martin, Y.; Mejia, G.; Broto-puig, F.; Diaz-Ferrero, M. A.; Comellas, L. (2005)  
209 Di-(2-ethylhexyl)phthalate in sewage sludge and post-treated sludge: Quantitative determination by  
210 HRGE-MS and mass spectral characterization. *Chemosphere* 59, 1191-1195.
- 211 2. Cai Q.Y., Mo C.H., Zhu X.Z. (2003) Effect of municipal sludge on the accumulation of organic  
212 pollutants in Ipomoea aquatic plant-paddy soil. *China Environmental Science*. 23(3):321-326.
- 213 3. Cai Q.Y., Mo C.H., Zeng Q.Y. (2004) Accumulation of di-(2-ethylhexyl) phthalate in various  
214 genotype Ipomoea aquatica-paddy soil system. *Chinese Journal of Applied Ecology*. 15: 1455-1458.
- 215 4. Cai Q.Y., Mo C.H., Li Y.H.(2005) The study of PAEs in soils from typical vegetable fields in areas

- 216 of Guangzhou and Shenzhen, South China. *Acta Ecologica Sinica*. 25 (2) :283-288.
- 217 5. Du, Q.; Shen, L.; Xiu, L.; Jerz, G.; Winterhalter, P. (2006) Di-2-ethylhexyl phthalate in the fruits of  
218 *Benincasa hispida*. *Food Addi. Contam.* 23, 552-555.
- 219 6. Du, Q.; Fu, X.; Xia, H. (2009) Uptake of di-(2-ethylhexyl)phthalate from plastic mulch film by  
220 vegetable plants. *Food Addi. Contam.* 26, 1325-1329.
- 221 7. Goulas A.E., Anifantaki K.I., Kolioulis D.G., (2000) Migration of di-(2-ethylhexyl) adipate plasticizer  
222 from food-grade polyvinyl chloride film into hard and soft cheeses. *Journal of Dairy Science*.  
223 83(8):1712-1718.
- 224 8. Lau, O.; Wong, S. (1996) Determination of plasticizers in food by gas chromatography-mass  
225 spectrometry with ion-trap mass detection. *J. Chromatogr. A*. 737, 338-342.
- 226 9. Mattina, M.I., Berger, W.L., Musante, C. (2003) Concurrent plant uptake of heavy metals and  
227 persistent organic pollutants from soil. *Environmental Pollution*. 124: 375-378.
- 228 10. Mirzaie, A., Jamshidi, S., Waqif-Husain. (2007) Fast chromatographic separation of plasticizers on  
229 thin layers of an inorganic ion-exchanger: quantitative determination of di(2-ethylhexyl) phthalate.  
230 *Chromatographia*. 65(3-4):147-154.
- 231 11. Song G.Y., Dai J.Y., Hu F. (2010) Accumulation of Phthalic Acid Esters in Different Types of  
232 Soil-Plant Systems. *Journal of Agro-Environment Science*. 29 (8) :1502-1508.
- 233 12. Shao L.Y., Niu H.Y., He T., Li H., Fang J.H. (2009) Distribution of the phthalate esters in PM10 of  
234 northwestern urban area in Beijing. *Environmental Engineering*. 300-303.
- 235 13. Wang S.J., He Y.Q., Ye S. (2010) Effects of Di-(2-ethylhexyl)Phthalate(DEHP) on POD Activities  
236 and MDA Contents in Stem and Leaves of *Vicia faba* Seedlings. *Asian Journal of Ecotoxicology*. 5  
237 (4) :587-591.
- 238 14. Sablayrolles, C.; Montrejaud-Vignoles, M.; Benanou, D.; Patria, L.; Treilhou, M. (2005)  
239 Development and validation of methods for the trace determination of phthalates in sludge and  
240 vegetables. *J. Chromatogr. A*. 1072: 233-242.
- 241 15. Wang Y.P., Su N. (2007) Sampling and analysis for phthalate esters in gas and particle phase.  
242 *Environmental Monitoring in China*. 23(4): 47-51.
- 243 16. Wang, M.L.; Shi, Y.X. (2007) Research on analytical method and environmental behavior of PAEs  
244 in vegetable greenhouse. Shandong Agricultural University. Ph. D. Dissertation. pp. 44-55.
- 245 17. Wang J.W. (2010) Concentrations and risk assessment of DEHP in vegetables around plastic  
246 industrial area. Dissertation. pp. 23-50.
- 247 18. Yin, R.; Lin, X.G.; Wang, S.G.; Zhang, H.Y. (2003) Effect of DBP/DEHP in vegetable planted soil  
248 on the quality of capsicum fruit. *Chemosphere*. 50: 801-805.
- 249 19. Zhang S.L., Guo K.Q. (2009) Migration amount of di-2-ethylhexyl phthalate from food-grade PVC  
250 film into meat at three temperatures. *Transaction of the CSAE*. 25(1):291-293.
- 251 20. Zeng Q.Y., Mo C.H., Wen R.L., Cai Q.Y. (2010) Difference of Root Anatomy Characteristics and

252 Its Effect on DEHP Accumulation in Two Genotypes of *Brassica parachinensis*. *Environmental*  
 253 *Science*. 31 (8) :1981-1986 .

254 21. Zeng Q.Y., Mo C.H., Cai Q.Y., Wen R.L. (2010) Root morphological and physiological  
 255 characteristics of two genotypes of *Brassica parachinensis* and their effect on di(2-ethylhexyl) phthalate  
 256 (DEHP) uptake. *Acta Scientiae Circumstantiae*. 30 (6) :1280-1285 .

257 22. Zeng Q.Y., Mo C.H., Wen R.L., Cai Q.Y. (2010) A Preliminary Study on the Effects of Two  
 258 Genotypes of *Brassica parachinensis* Root Exudates on DEHP Desorption in Paddy Soil. *Journal of*  
 259 *Agro-Environment Science*. 29 (8) : 1466-1470.

260 23. Zheng W.Z.; Zhou Y.Q., Zhang L.L. (2006) Study on the Rules of Transfer of Plasticizers PAEs of  
 261 Plastic PVC in water Enviroment. *Guangdong Chemical Industry*. 33(3):29-30.

262

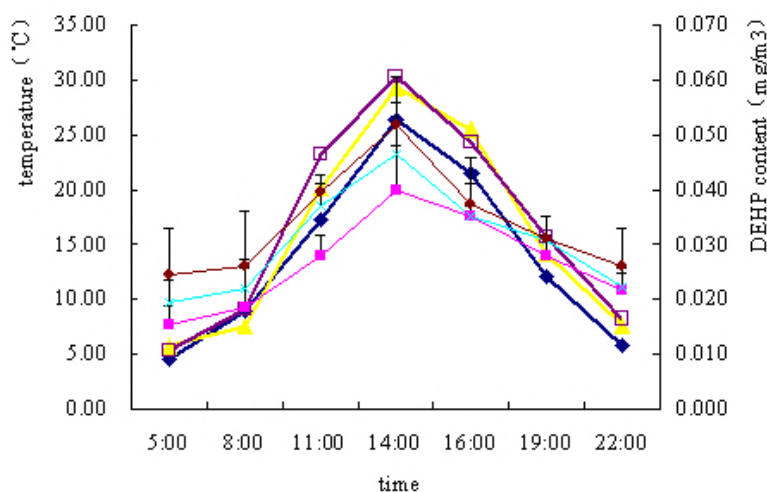

263

264 Figure 1 The change of temperature and DEHP content of air in the greenhouse during a day.

265 March 24, 2011; ◆temperature; ■DEHP content

266 March 25, 2011; ▲temperature; ×DEHP content

267 March 26, 2011; □temperature; ○DEHP content

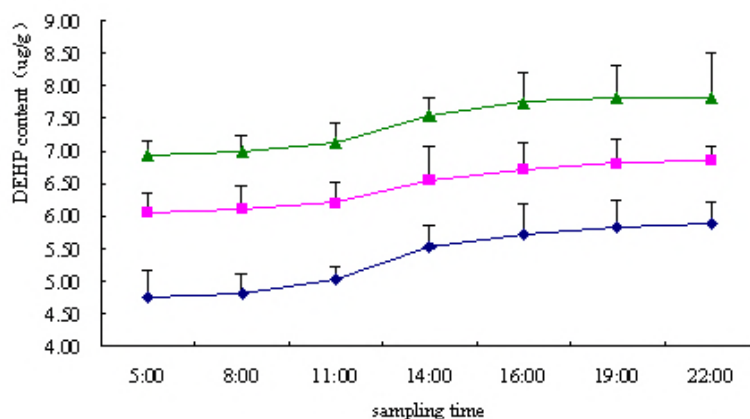

268

269

◆March 24, 2011; ■March 25, 2011; ▲March 26, 2011



270

Figure 2 The change of DEHP content of *B.chinensis* cultivated in the greenhouse.

271

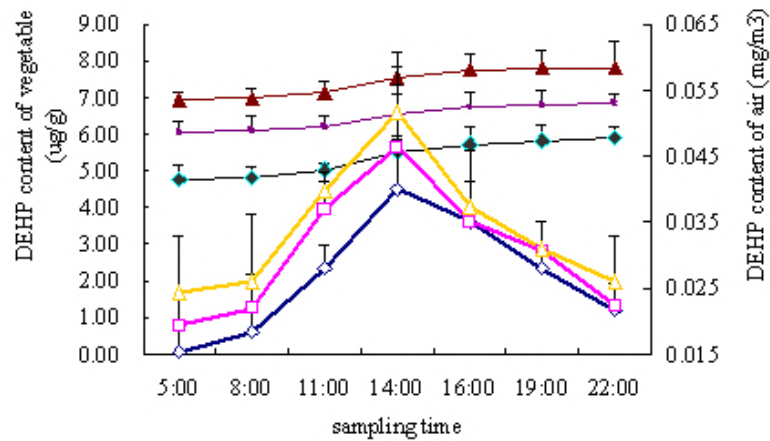

272

Figure 3 The comparison between the changes of DEHP content of air and *B.chinensis* in the greenhouse.

273

274

275

276

277

278

279

March 24, 2011; ◇ air; ◆ *B.chinensis*

March 25, 2011; □ air; ■ *B.chinensis*

March 26, 2011; △ air; ▲ *B.chinensis*

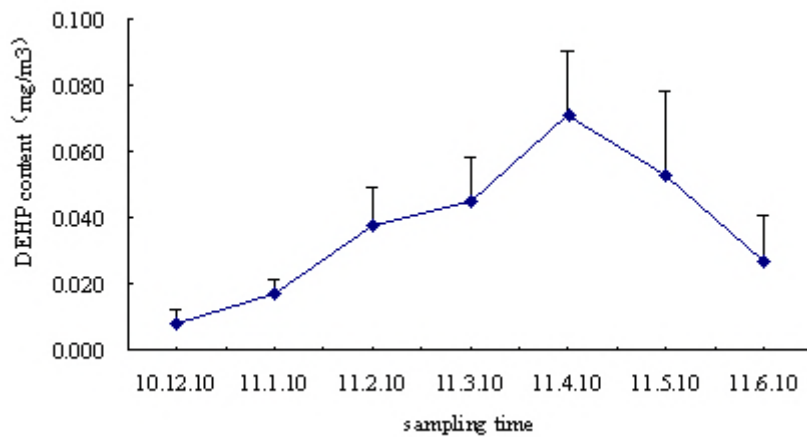

280

281

Figure 4 The monthly variation of DEHP content of air in the greenhouse.

282

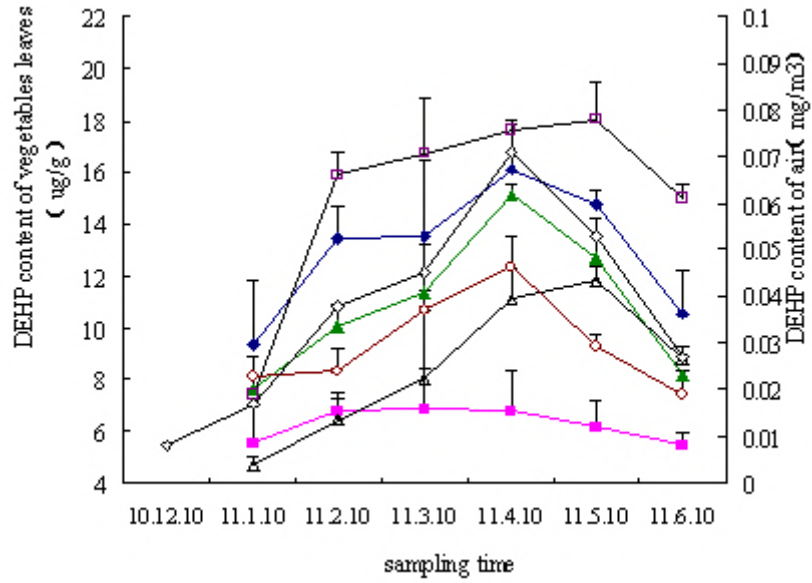

283

284 Figure 5 The monthly variation of DEHP content of the different vegetables from the greenhouse.

285 (◆ *B. chinensis*; ■ *B. oleracea*; ▲ *S. oleracea*; △ *A. graveolens*; □ *L. sativa*; ○ *A. mangostanus*;

286 ◇ air)
